# Supplementary material for: Health-Specific Information and Communication Technology Use and Its Relationship to Obesity in High-Poverty, Urban Communities: Analysis of a Population-Based Biosocial Survey
Source: PubMed Central journal article supplement (PMC4942684; doi:10.2196/jmir.5741), 2016-06-28
Supplement: jmir_v18i6e182_app1.pdf [file jmir_v18i6e182_app1.pdf]

## Multimedia Appendix 1: Frequency of health-specific ICT activities (%[95%CI])

| Health-specific ICT activities <sup>a</sup>                                                                                                                                       | Every day     | At least once per week | At least once per month | Less than once per month | Never           |
|-----------------------------------------------------------------------------------------------------------------------------------------------------------------------------------|---------------|------------------------|-------------------------|--------------------------|-----------------|
| Seek health info online                                                                                                                                                           | 4.8(1.7-7.8)  | 11.7(7.2=16.2)         | 14.3(9.6-19.0)          | 16.5(11.00-21.9)         | 52.8(45.5-60.0) |
| Access health benefit info online                                                                                                                                                 | 0.5(-0.5-1.5) | 0.6(-0.6-1.8)          | 2.4(0.5-4.2)            | 8.7(5.0-12.5)            | 87.8(83.4-92.2) |
| Participant in online health support group                                                                                                                                        | 0             | 1.1(-0.1-2.8)          | 1.4(0.1-2.6)            | 6.8(3.2-10.5)            | 90.7(86.6-94.9) |
| Access online health records                                                                                                                                                      | 0             | 0                      | 3.1(0.5-5.6)            | 5.7(2.7-8.8)             | 91.2(87.3-95.1) |
| Purchase medications online                                                                                                                                                       | 0             | 0.6(-0.3-1.5)          | 2.6(0.6-4.6)            | 4.5(1.8-7.2)             | 92.3(88.9-95.7) |
| Communicate with providers online                                                                                                                                                 | 0             | 0.9(-0.3-2.2)          | 1.1(-0.1-2.4)           | 7.6(4.2-11.1)            | 90.3(86.5-94.1) |
| <sup>a</sup> Information on use frequency was not collected for the following activities: “Use of online resource to avoid asking doctor” and “Use of health-related mobile apps” |               |                        |                         |                          |                 |
